# Supplementary material for: A convenient and efficient precursor transformation route to well-dispersed, stable, and highly accessible supported Au nanocatalysts with excellent catalytic hydrogenation performances
Source: Royal Society of Chemistry journal article supplement (doi:10.1039/c8ra08379g), 2018-01-01
Supplement: c8ra08379g1.pdf [file c8ra08379g1.pdf]

## Supporting Information

A convenient and efficient precursor transformation route to well-dispersed, stable, and highly accessible supported Au nanocatalysts with excellent catalytic hydrogenation performances

Jin-Feng Xie<sup>a,§</sup>, Hai-Tao Li<sup>a,§</sup>, Qiang Gao<sup>a,\*</sup>, Hao Wang<sup>a</sup>, Yan-Sheng Gong<sup>b,\*</sup>

<sup>a</sup>*Department of Chemistry, Faculty of Material Science and Chemistry, China University of Geosciences, Wuhan 430074, PR China.*

<sup>b</sup>*Department of Materials Science and Engineering, Faculty of Material Science and Chemistry, China University of Geosciences, Wuhan 430074, PR China.*

\*Corresponding authors:

Tel./Fax: +86 027 6788 3731;

E-mail addresses: [gaoqiang@cug.edu.cn](mailto:gaoqiang@cug.edu.cn) (Q. Gao);

[gongysh@cug.edu.cn](mailto:gongysh@cug.edu.cn) (Y. Gong).

<sup>§</sup>*The two authors contributed equally to this work.*

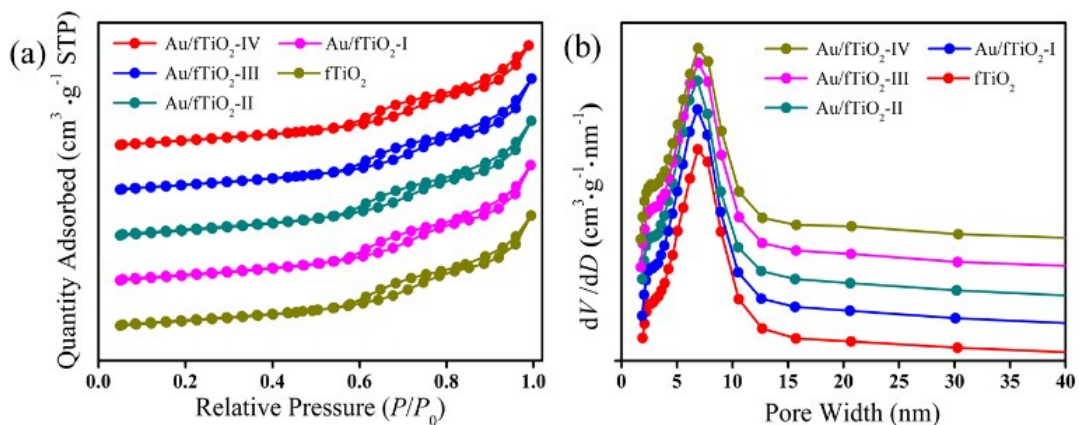

**Fig. S1** (a)  $N_2$  adsorption/desorption isothermal curves and (b) corresponding BJH pore size distribution curves of the flower-like titania samples without and with AuNPs loading.

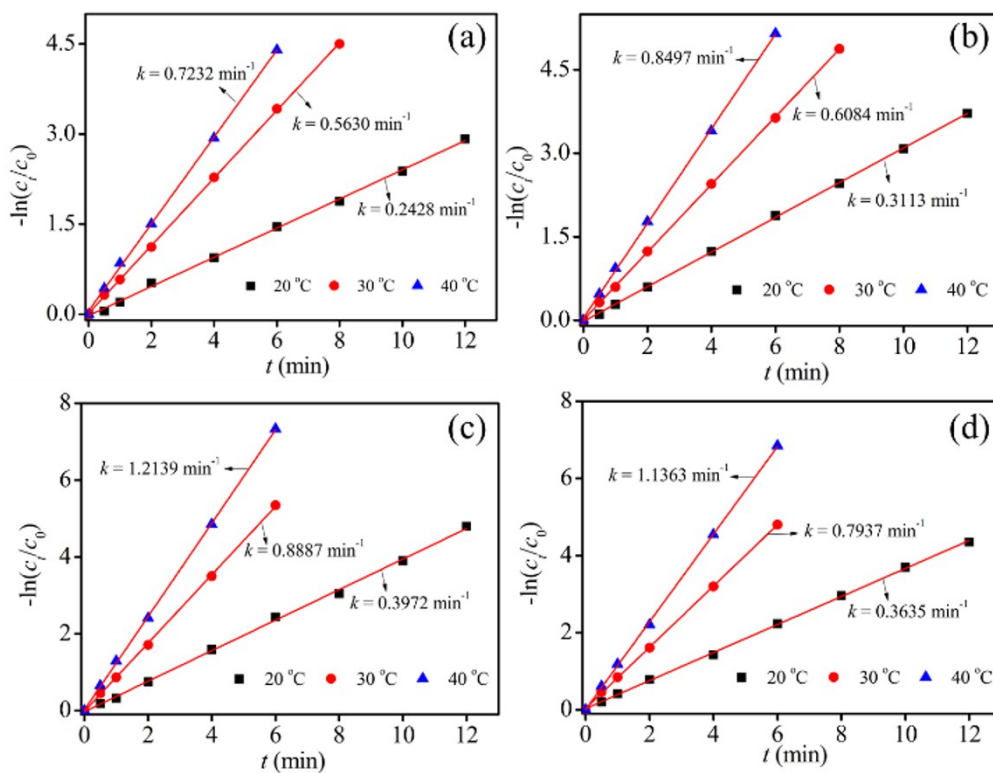

**Fig. S2** Reduction kinetic curves of 4-NP catalyzed by (a) AuNPs/fTiO<sub>2</sub>-I, (b) AuNPs/fTiO<sub>2</sub>-II, (c) AuNPs/fTiO<sub>2</sub>-III, and (d) AuNPs/fTiO<sub>2</sub>-IV under different reaction temperatures.

**Table S1** Comparison of the textural parameters of different Au-loaded TiO<sub>2</sub> nanocomposites.

| Sample                                                    | Surface area<br>(m <sup>2</sup> ·g <sup>-1</sup> ) | Pore volume<br>(cm <sup>3</sup> ·g <sup>-1</sup> ) | Ref.      |
|-----------------------------------------------------------|----------------------------------------------------|----------------------------------------------------|-----------|
| Au-loaded TiO <sub>2</sub><br>nanotubes                   | 92.39                                              | 0.31                                               | 1         |
| Au-loaded<br>mesoporous TiO <sub>2</sub><br>(1.0 mol% Au) | 133                                                | 0.27                                               | 2         |
| Au-loaded<br>mesoporous TiO <sub>2</sub><br>(2.0 mol% Au) | 119                                                | 0.23                                               | 2         |
| Au-loaded<br>mesoporous TiO <sub>2</sub><br>(5.0 mol% Au) | 89                                                 | 0.16                                               | 2         |
| Au@TiO <sub>2</sub>                                       | 59                                                 | \                                                  | 3         |
| Au-loaded<br>dendrimer derived<br>TiO <sub>2</sub>        | 56.9                                               | 0.12                                               | 4         |
| Au-loaded<br>unsulphated TiO <sub>2</sub>                 | 89                                                 | \                                                  | 5         |
| Au-loaded<br>sulphated TiO <sub>2</sub>                   | 132                                                | \                                                  | 5         |
| AuNPs/fTiO <sub>2</sub> -I~IV                             | 142.3~149.3                                        | 0.39~0.43                                          | This work |

## References

- 1 Q. Zhao, M. Li, J. Chu, T. Jiang and H. Yin, *Appl. Surf. Sci.*, 2009, **255**, 3773.
- 2 H. Li, Z. Bian, J. Zhu, Y. Huo, H. Li and Y. Lu, *J. Am. Chem. Soc.*, 2007, **129**, 4538.
- 3 I. Lee, J. Joo, Y. Yin and F. Zaera, *Angew. Chem. Int. Ed.*, 2011, **50**, 10208.
- 4 M. Nemanashi and R. Meijboom, *Catal. Lett.*, 2013, **143**, 324.
- 5 A. Baylet, C. Capdeillayre, L. Retailleau, J. Valverde, P. Vernoux and A. Giroir-Fendler, *Appl. Catal., B*, 2011, **102**, 180.
